# Supplementary material for: A proposed new scheme for vibronically resolved time-dependent photoelectron spectroscopy: pump–repump-continuous wave-photoelectron spectroscopy (prp-cw-pes)
Source: Royal Society of Chemistry journal article supplement (doi:10.1039/c5cp07889j), 2016-01-01
Supplement: c5cp07889j8.pdf [file c5cp07889j8.pdf]

## Supplementary Information (A15.05.0073)

*A proposed new scheme for vibronically resolved time-dependent photoelectron spectroscopy: pump-repump-continuous wave-photoelectron spectroscopy (prp-cw-pes)*

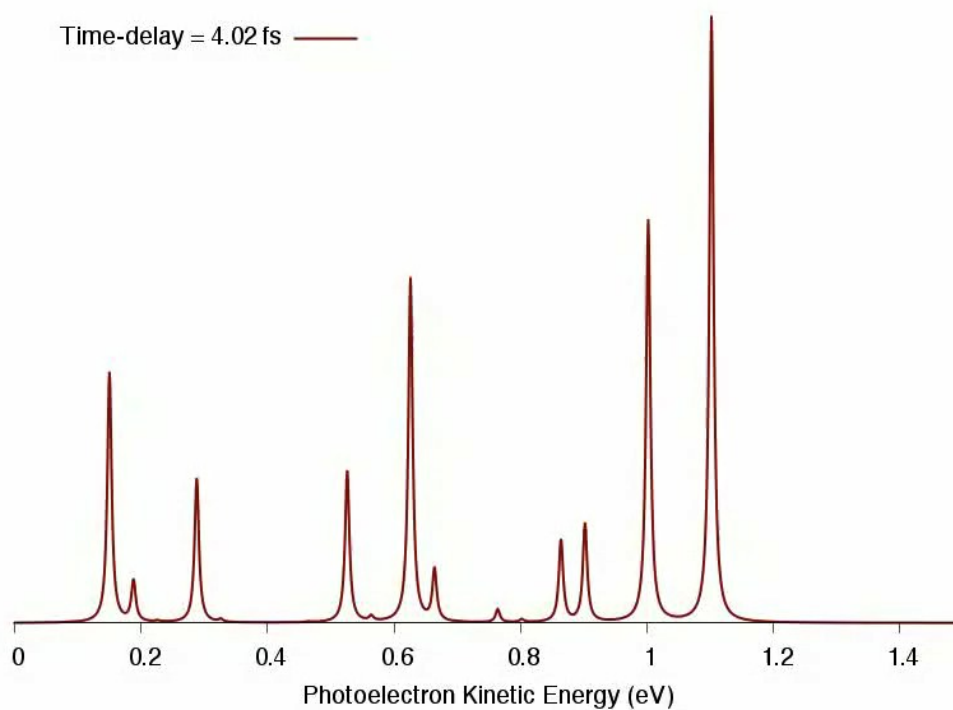

Movie 1: Rapidly varying snapshots as a function of pump-repump time-delay, as a result of fast oscillations of populations in excited state when the pump and repump lasers are in phase, as discussed in section III of the manuscript

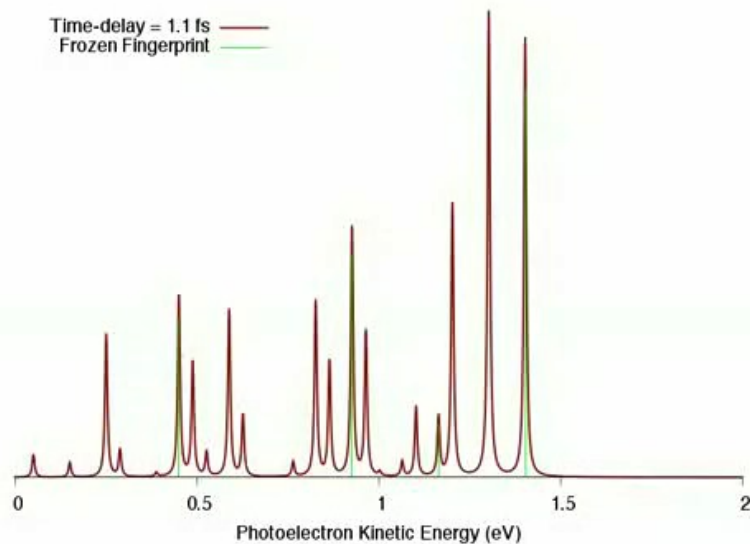

Time-delay = 1.1 fs —  
Frozen Fingerprint —

Movie 2: Some features of snapshots become independent of time-delay, by choosing suitable phase relation, as described in section III of the text

Movie 3: The frequency of oscillations of populations can be made much smaller by choosing the phase on electronic resonance (equal to excitation energy) resulting in slow evolution of snapshots as a function of time-delay, as described in section III of the text

Photoelectron Kinetic Energy (eV)

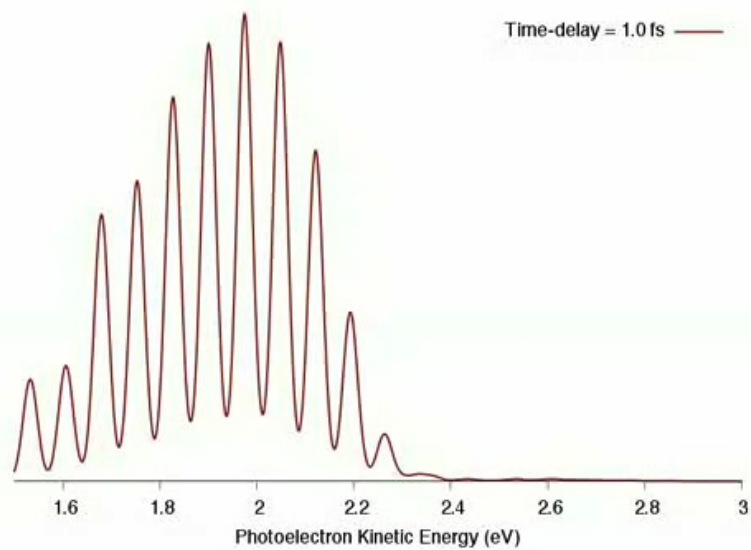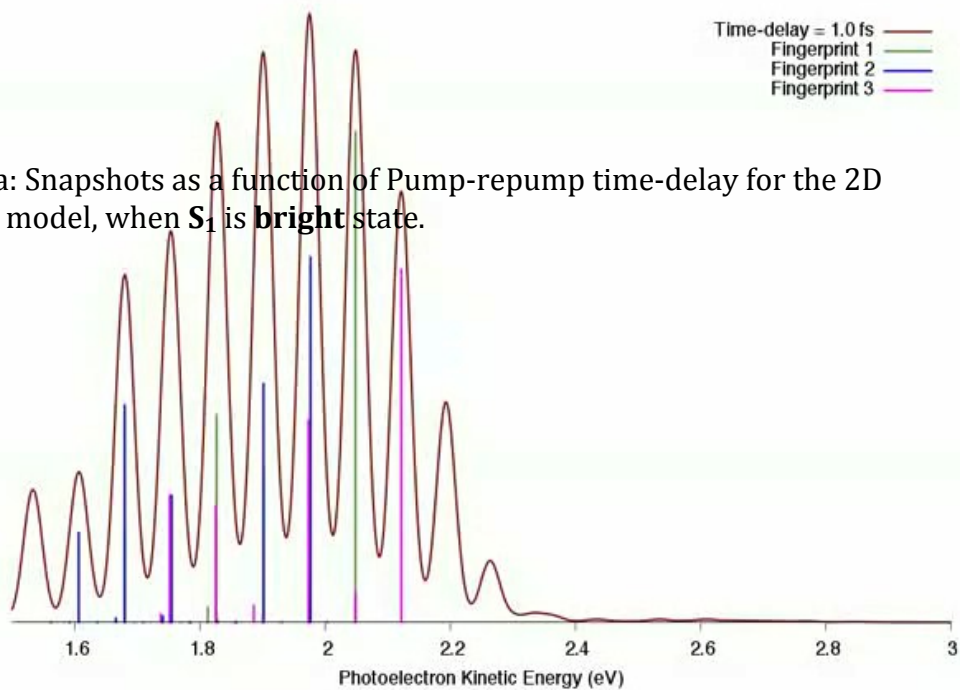

Movie 4a: Snapshots as a function of Pump-repump time-delay for the 2D vibronic model, when  $S_1$  is **bright** state.

Movie 4b(Same as 4a): Fingerprints corresponding to a particular vibronic excited level grow in unison. Monitoring a particular level (colored sticks) shows that these lines move up and down together as a function of time-delay. Only a few fingerprints are needed to capture dominant features of the snapshots.

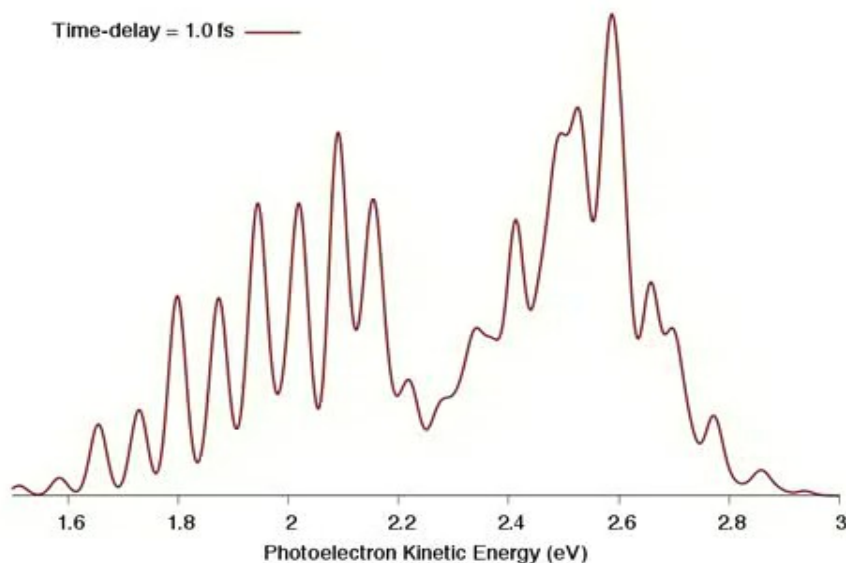

Movie 5a: Snapshots as a function of Pump-repump time-delay for the 2D vibronic model, when  $S_2$  is **bright** state. [As discussed in Section IV]

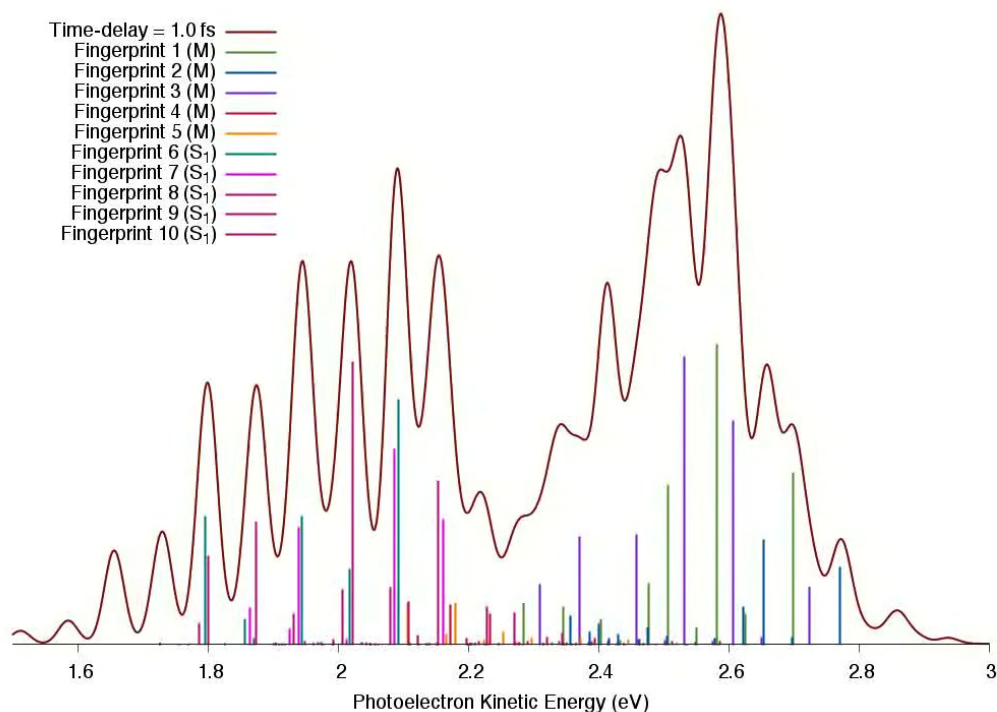

Movie 5b (Same as 5a): The right part of the snapshots are captured well by only a few fingerprints (M), while the left part needs many fingerprints of both M and in particular  $S_1$  fingerprints.

**M:** Excited vibronic eigenstates with “mixed” character ( $S_1 / S_2$ )

**$S_1$ :** Excited vibronic eigenstates with more than 80%  $S_1$  character
